# Supplementary material for: Whole genome functional analysis identifies novel components required for mitotic spindle integrity in human cells
Source: PubMed Central journal article supplement (PMC2374723; doi:10.1186/gb-2008-9-2-r44), 2008-02-26
Supplement: gb-2008-9-2-r44-S5.pdf [file gb-2008-9-2-r44-S5.pdf]

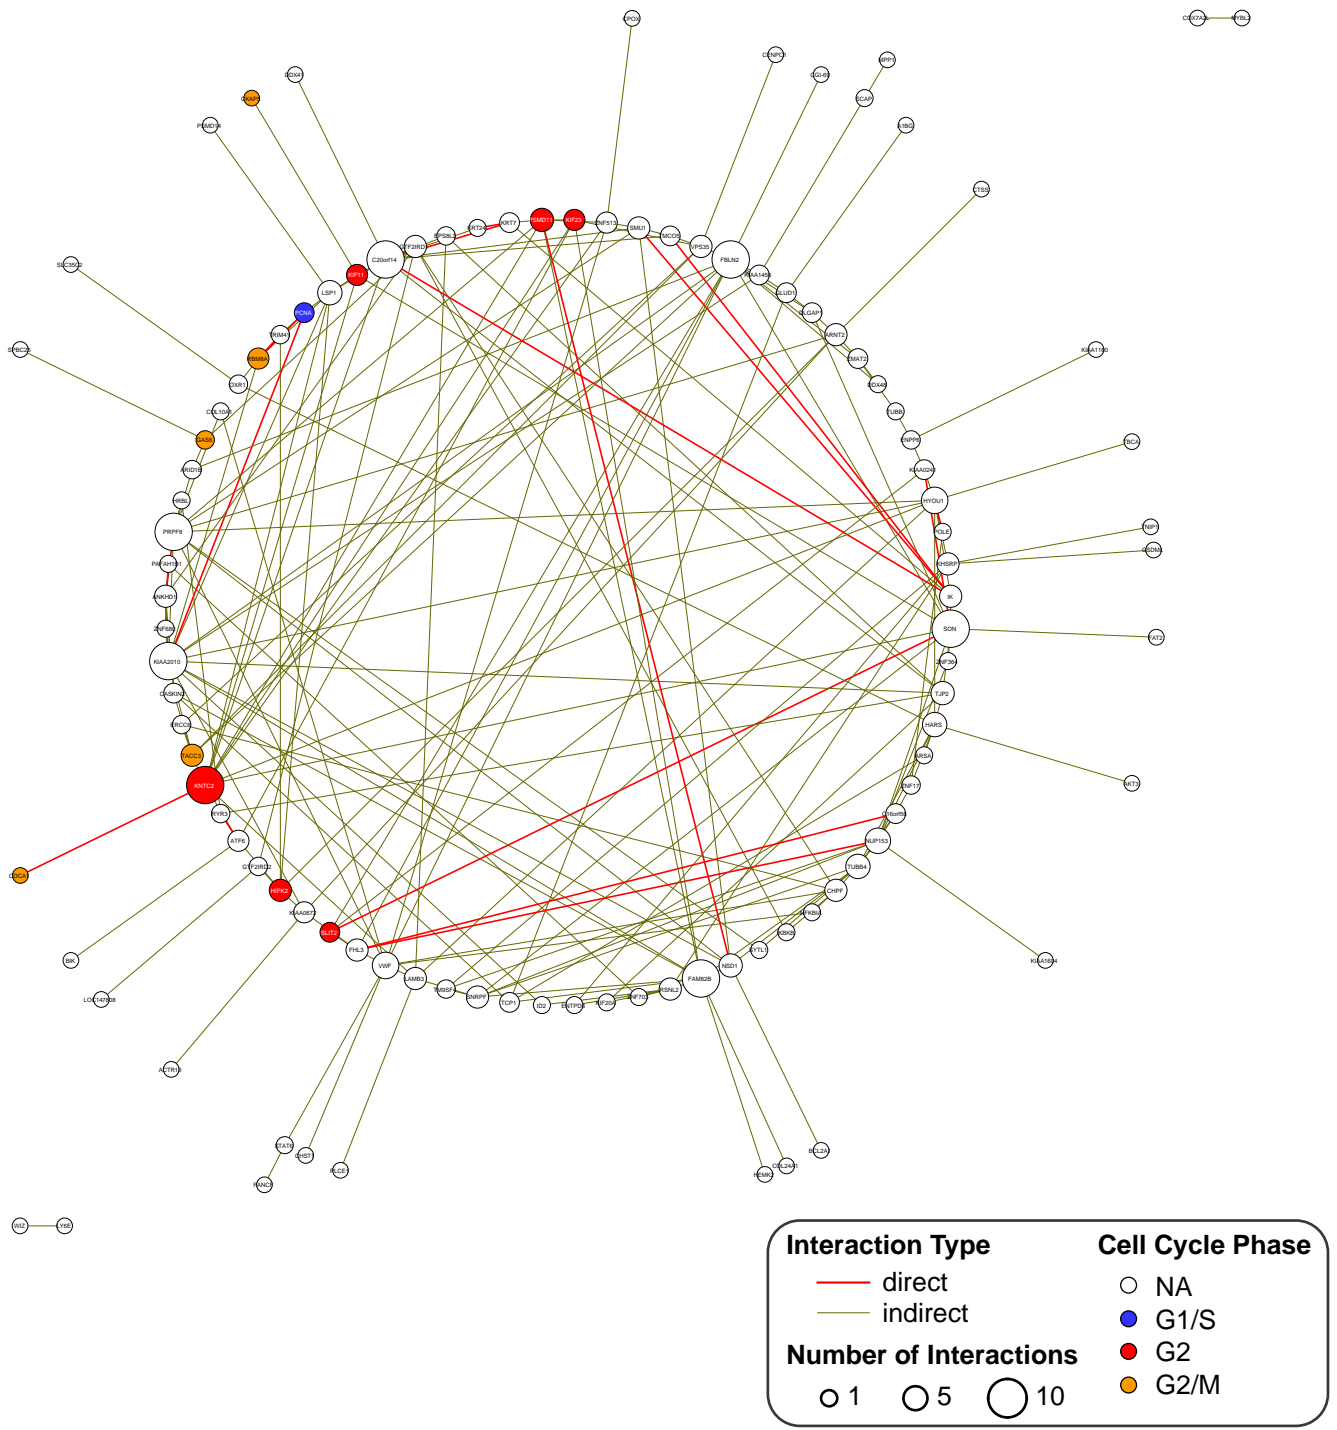

Figure S2
